# Supplementary material
Source: Springer Nature journal article supplement (https://www.springermedizin.de/resource/supplementary/12889_2011_5015_MOESM3_ESM.pdf/9490536)
Supplement: MOESM3 [file 9490536]

FG topic of discussion/major theme

Do people like the minimum price per unit of alcohol proposal?

Primary themes

Dislike for a minimum price per unit of alcohol

Support for the introduction of a minimum price per unit

Secondary themes

Punishing the moderate or 'sensible' drinker

Suspicion of government motives

A restriction of the personal freedom to drink alcohol

"There must be a better way than this"

Minimum pricing unfairly targets the poor

"There's more to alcohol reduction than price"

The need for action to curb excessive alcohol consumption

The prospect of improved public health

"It doesn't bother me, I don't drink that much"
